# Supplementary material for: Synthesis and characterisation of copper(i) complexes with relevance to intramolecular Ullmann O,S-arylation
Source: Royal Society of Chemistry journal article supplement (doi:10.1039/d4dt01418a), 2024-01-01
Supplement: d4dt01418a1.pdf [file d4dt01418a1.pdf]

## Supporting Information

# Synthesis and Characterisation of Copper(I) Complexes with Relevance to Intramolecular Ullmann O, S-arylation

Xiaodong Jin<sup>a,b</sup>, Bao-Nguyen T. Nguyen<sup>a</sup> and Robert P. Davies<sup>\*a</sup>

<sup>a</sup> Department of Chemistry, Molecular Sciences Research Hub, Imperial College London,  
White City Campus, Wood Lane, London, W12 0BZ, UK.

<sup>b</sup> Department of Chemistry, Xi'an Jiaotong-Liverpool University, Suzhou 215123, China.

\*Corresponding Author

E-mail: [r.davies@imperial.ac.uk](mailto:r.davies@imperial.ac.uk)

Tel: +44 (0)207 5945754

## Table of Contents

|          |                                                                                                                                              |           |
|----------|----------------------------------------------------------------------------------------------------------------------------------------------|-----------|
| <b>1</b> | <b>Experimental</b> .....                                                                                                                    | <b>2</b>  |
| 1.1      | General .....                                                                                                                                | 2         |
| 1.2      | Synthesis of 2-Halogenbenzanilide .....                                                                                                      | 2         |
| 1.3      | Synthesis of 2-Halogenthiobenzanilide .....                                                                                                  | 3         |
| 1.4      | Synthesis of 1-Benzyl-3-(2-halogenphenyl) Thiourea .....                                                                                     | 4         |
| 1.5      | Synthesis of 1-Benzyl-3-(2-halogenphenyl) Urea.....                                                                                          | 5         |
| 1.6      | General O- and S-Arylation Procedure using Cs <sub>2</sub> CO <sub>3</sub> .....                                                             | 5         |
| 1.7      | Synthesis of Mesitylcopper(I) .....                                                                                                          | 6         |
| 1.8      | General Copper(I) Complexes Synthesis Procedure .....                                                                                        | 7         |
| 1.9      | Cu <sub>4</sub> N <sub>4</sub> O <sub>4</sub> C <sub>4</sub> and Cu <sub>4</sub> N <sub>4</sub> S <sub>4</sub> C <sub>4</sub> clusters ..... | 9         |
| <b>2</b> | <b>X-ray Crystallographic Data</b> .....                                                                                                     | <b>11</b> |
| <b>3</b> | <b>NMR spectra</b> .....                                                                                                                     | <b>17</b> |
| <b>4</b> | <b>References</b> .....                                                                                                                      | <b>19</b> |

## 1 Experimental

### 1.1 General

For reactions that required air-free techniques, all glassware was pre-dried at 120 °C overnight and loaded in a glove-box under nitrogen. The experiments were carried out under a protective atmosphere of N<sub>2</sub>. Anhydrous solvents such as dichloromethane, tetrahydrofuran, hexane, and toluene were obtained from a solvent tower using the PureSolv solvent purification system, degassed under N<sub>2</sub>, and stored over molecular sieves. Anhydrous DMSO and dioxane were purchased in Sure/Seal™ bottles and used directly from the bottle. Deuterated solvents such as DMSO-*d*<sub>6</sub> and chloroform-*d* were purchased from Sigma-Aldrich or VWR and dried over 4 Å molecular sieves under N<sub>2</sub> before use. Copper(I) iodide (99.999% trace metals basis, powder) purchased from Sigma-Aldrich was stored in a glove box under N<sub>2</sub>. All ligands and aryl halides were purchased from Sigma-Aldrich or VWR and used as received without further purification.

<sup>1</sup>H and <sup>13</sup>C NMR analysis was carried out at room temperature using Bruker AV-400 spectrometers. Chemical shifts (δ) are reported in parts per million (ppm) from tetramethylsilane and are referenced to the residual protonated solvent and carbon resonances of the solvent in <sup>1</sup>H and <sup>13</sup>C NMR spectra respectively. Coupling constants (*J*) are *J* coupling constant values are given in Hz units. <sup>1</sup>H and <sup>13</sup>C NMR analysis was performed using MESTRELAB MestReNova software. CHN microanalyses were carried out at the London Metropolitan University, UK. GC-MS analysis was performed on a Micromass Autospec Premier/Agilent HP6890 GC.

### 1.2 Synthesis of 2-Halogenbenzanilide

Compounds were prepared according to previous publication.<sup>1</sup> 2-halogenaniline (5.0 mmol) was dissolved in dry THF (10 mL) in a round bottom flask at room temperature followed by slow addition of benzoyl chloride (5.0 mmol) and the mixture was stirred at room temperature for 2 h. The solvent was removed by rotary evaporation, yielding the

solid crude product. The solid was redissolved in 20 mL ethyl acetate and washed with distilled water and brine and the organic layer was separated and dried over MgSO<sub>4</sub>. The pure product was collected by rotary evaporation without any further purification.

2-Chlorobenzanilide (**1a**): white solid (1.14 g, 98%); Melting point: 112 – 115 °C (lit 114 – 116 °C); <sup>1</sup>H NMR (400 MHz, Chloroform-*d*) δ 8.59 (dd, *J* = 8.3, 1.5 Hz, 1H), 8.49 (s, 1H), 7.99 – 7.91 (m, 2H), 7.65 – 7.55 (m, 1H), 7.59 – 7.49 (m, 2H), 7.44 (dd, *J* = 8.0, 1.5 Hz, 1H), 7.40 – 7.31 (m, 1H), 7.11 (ddd, *J* = 8.0, 7.4, 1.6 Hz, 1H). <sup>13</sup>C NMR (101 MHz, Chloroform-*d*) δ 165.29, 134.75, 134.63, 132.20, 129.03, 128.95, 127.89, 127.10, 124.76, 123.04, 121.52; IR (ATR)  $\nu_{\text{max}}/\text{cm}^{-1}$ : 3219 (N-H), 1651 (C=O), 1517 (N-H), 1298 (C-C aromatic), 1057 (C-N), 711 (C-Cl); MS: *m/z* = 232.0 [M + H]<sup>+</sup>.

2-Bromobenzanilide (**1b**): Light yellow solid (1.32 g, 96%); Melting point: 112 – 113 °C (lit. 111 – 113 °C); <sup>1</sup>H NMR (400 MHz, Chloroform-*d*) δ 8.58 (dd, *J* = 8.2, 1.6 Hz, 1H), 8.50 (s, 1H), 8.01 – 7.86 (m, 2H), 7.65 – 7.45 (m, 4H), 7.39 (ddd, *J* = 8.5, 7.5, 1.5 Hz, 1H), 7.04 (td, *J* = 7.7, 1.6 Hz, 1H). <sup>13</sup>C NMR (101 MHz, Chloroform-*d*) δ 165.45, 136.03, 134.80, 132.46, 132.41, 129.17, 128.76, 127.31, 125.48, 121.95, 113.94. IR (ATR)  $\nu_{\text{max}}/\text{cm}^{-1}$ : 3276 (N-H), 1652 (C=O), 1578 (N-H), 1310 (C-C aromatic), 1028 (C-N), 642 (C-Br); MS: *m/z* = 276.0 [M + H]<sup>+</sup>.

### 1.3 Synthesis of 2-Halogenthiobenzanilide

Compounds were prepared according to previous publication.<sup>2</sup> The Lawesson's reagent (4.8 mmol) was added to a solution of 2'-halobenzanilide (4.0 mmol) in dry THF (20 mL). The mixture was refluxed for 6 h at 80 °C followed by evaporation of the solvent under vacuum. The pure product was obtained after purification by flash chromatography (Hexane: EtOAc = 1: 1).

2-Chlorothiobenzanilide (**2a**): Yellow solid (0.81 g, 82%); Melting point: 71 – 73 °C (lit. 69 – 71 °C); <sup>1</sup>H NMR (400 MHz, Chloroform-*d*) δ 9.34 (s, 1H), 8.76 (s, 1H), 7.92 (d, *J* = 7.5 Hz, 2H), 7.62 – 7.33 (m, 28H), 7.32 – 7.20 (m, 5H); <sup>13</sup>C NMR (101 MHz, Chloroform-*d*) δ 135.77, 131.51, 129.59, 128.77, 127.52, 127.23, 126.94, 126.85,

125.01; IR (ATR)  $\bar{\nu}_{\text{max}}/\text{cm}^{-1}$ : 3195 (NH), 1503 (C-S), 1441 (C=C aromatic), 1058 (C-N), 683 (C-Cl); MS:  $m/z = 248.0$  [M + H]<sup>+</sup>.

2-2-Bromothiobenzanilide (**2b**): Yellow crystalline (1.15 g, 79%); Melting point: 86 – 88 °C (lit. 83 – 85 °C); <sup>1</sup>H NMR (400 MHz, Chloroform-*d*)  $\delta$  9.31 (s, 1H), 8.68 (s, 1H), 7.98 – 7.90 (m, 2H), 7.70 (dd,  $J = 8.1, 1.5$  Hz, 1H), 7.62 – 7.37 (m, 4H), 7.20 (td,  $J = 7.7, 1.6$  Hz, 1H); <sup>13</sup>C NMR (101 MHz, Chloroform-*d*)  $\delta$  136.96, 132.83, 131.52, 128.75, 128.03, 127.88, 126.90, 125.62, 117.76, 76.73. IR (ATR)  $\bar{\nu}_{\text{max}}/\text{cm}^{-1}$ : 3188 (N-H), 1499 (C-S), 1484 (C=C aromatic), 685 (C-Br); MS:  $m/z = 292.0$  [M + H]<sup>+</sup>.

#### 1.4 Synthesis of 1-Benzyl-3-(2-halogenphenyl) Thiourea

Compounds were prepared according to previous publication.<sup>1</sup> 2-Halogenisothiocyanate (5.0 mmol) was slowly added to a solution of benzylamine (5.0 mmol) and triethylamine (5.0 mmol) in DCM (50 mL). The reaction was allowed to run overnight to reach the completion. Solid product was obtained after evaporation of the solvent under vacuum. No further purification was required.

1-Benzyl-3-(2-chlorogenphenyl)-thiourea (**3a**): White solid (1.21 g, 94%); Melting point: 160 – 162 °C; <sup>1</sup>H NMR (400 MHz, Chloroform-*d*)  $\delta$  7.53 – 7.45 (m, 2H), 7.39 – 7.36 (m, 1H), 7.36 – 7.29 (m, 5H), 7.24 (td,  $J = 7.7, 1.7$  Hz, 1H), 4.89 (s, 2H); <sup>13</sup>C NMR (101 MHz, Chloroform-*d*)  $\delta$  128.86, 127.74, 127.01, 110.00 IR (ATR)  $\bar{\nu}_{\text{max}}/\text{cm}^{-1}$ : 3217 (N-H), 3053 (N-H), 1546 (C=S), 1311 (C-C aromatic), 1054 (C-N), 727 (C-Cl); MS:  $m/z = 277.0$  [M + H]<sup>+</sup>.

1-Benzyl-3-(2-bromogenphenyl)-thiourea (**3b**): Pale yellow solid (1.52 g, 95%); Melting point: 156 – 158 °C; <sup>1</sup>H NMR (400 MHz, Chloroform-*d*)  $\delta$  7.68 (dd,  $J = 8.1, 1.4$  Hz, 1H), 7.46 (t,  $J = 4.3$  Hz, 1H), 7.37 (dd,  $J = 7.5, 1.4$  Hz, 2H), 7.35 – 7.25 (m, 5H), 7.18 (td,  $J = 7.8, 1.7$  Hz, 1H), 6.23 (s, 1H), 4.89 (s, 2H); <sup>13</sup>C NMR (101 MHz, Chloroform-*d*)  $\delta$  128.86, 127.91, 127.75, 127.37 IR (ATR)  $\bar{\nu}_{\text{max}}/\text{cm}^{-1}$ : 3216 (N-H), 3050 (N-H), 1546 (C=S), 1336 (C-C aromatic), 693 (C-Br); MS:  $m/z = 321.0$  [M + H]<sup>+</sup>.

## 1.5 Synthesis of 1-Benzyl-3-(2-halogenphenyl) Urea

Compounds were prepared according to previous publication.<sup>3</sup> Benzyl isocyanate (5.0 mmol) was slowly added to a solution of benzylamine (5.0 mmol) and triethylamine (5.0 mmol) in dichloromethane (10 mL). The reaction was allowed to run overnight to reach the completion. White solid was obtained after evaporation of the solvent under vacuum. No further purification was required.

1-Benzyl-3-(2-chlorogenphenyl)-urea: White solid (1.32 g, 96%); Melting point: 111 – 113 °C; <sup>1</sup>H NMR (400 MHz, DMSO-*d*<sub>6</sub>) δ 9.04 (s, 1H) 8.17 (dd, *J* = 8.3, 1.6 Hz, 1H), 8.10 (d, *J* = 7.5 Hz, 1H), 7.51 – 7.43 (m, 1H), 7.43 – 7.36 (m, 2H), 7.36 – 7.20 (m, 3H), 6.96 (td, *J* = 7.7, 1.6 Hz, 1H), 4.32 (d, *J* = 5.7 Hz, 2H); <sup>13</sup>C NMR (101 MHz, DMSO-*d*<sub>6</sub>) 129.53, 128.85, 127.92, 127.74, 127.34, 122.96, 121.22, 43.32, 40.62, 40.41, 40.21; IR (ATR)  $\nu_{\max}/\text{cm}^{-1}$ : 3323 (N-H), 3295 (N-H), 1634 (C=O), 1589 (N-H), 699 (C-Cl); MS: *m/z* = 261.9 [M + H]<sup>+</sup>.

1-Benzyl-3-(2-bromogenphenyl)-urea: White solid (1.41 g, 92%); Melting point: 166 – 168 °C (lit. 168 °C); <sup>1</sup>H NMR (400 MHz, DMSO-*d*<sub>6</sub>) δ 8.09 (dd, *J* = 8.3, 1.6 Hz, 1H), 7.93 (s, 1H), 7.59 – 7.50 (m, 2H), 7.42 – 7.29 (m, 5H), 7.28 – 7.17 (m, 1H), 6.96 – 6.85 (m, 1H), 4.32 (d, *J* = 5.7 Hz, 2H); <sup>13</sup>C NMR (101 MHz, DMSO-*d*<sub>6</sub>) δ 132.81, 128.85, 128.43, 127.75, 127.34, 123.74, 122.05, 43.35, 40.62, 40.42, 40.21; IR (ATR)  $\nu_{\max}/\text{cm}^{-1}$ : 3326 (N-H), 3295 (N-H), 1635 (C=O), 1555 (N-H), 494 (C-Cl); MS: *m/z* = 305.0 [M + H]<sup>+</sup>.

## 1.6 General O- and S-Arylation Procedure using Cs<sub>2</sub>CO<sub>3</sub>

A sample vial was charged with Cs<sub>2</sub>CO<sub>3</sub> (65 mg, 0.15 mmol) and aryl halides (100 μL, 1 M in DMSO-*d*<sub>6</sub>, 0.1 mmol) followed by addition of CuI solution (50 μL, 0.1 M in DMSO-*d*<sub>6</sub>, 5 mol%), ligand (100 μL, 0.1 M in DMSO-*d*<sub>6</sub>, 10 mol%) and internal standard naphthalene (100 μL, 0.5 M in DMSO-*d*<sub>6</sub>, 0.05 mmol). Another 650 μL of DMSO-*d*<sub>6</sub> was added to make up the total volume to 1 mL. The reaction was then stirred at 80 °C for 6 h. The mixture was cooled to room temperature and the clear organic layer was

transferred into Young's type NMR tube under an N<sub>2</sub> atmosphere. The conversion and yield were determined by <sup>1</sup>H NMR.

2-Phenylbenzoxazole: <sup>1</sup>H NMR (400 MHz, Chloroform-*d*) δ 8.27 (d, *J* = 4.0 Hz, 2H), 7.81-7.78 (m, 1H), 7.60-7.56 (m, 1H), 7.54-7.52 (m, 3H), 7.39-7.33 (m, 2H); <sup>13</sup>C NMR (100 MHz, Chloroform-*d*, ppm) δ 163.0, 150.8, 142.1, 131.5, 128.9, 127.6, 127.2, 125.1, 124.6, 120.0, 110.6; <sup>1</sup>H NMR (400 MHz, DMSO-*d*<sub>6</sub>): δ 8.20 (dd, *J* = 8.0, 1.6 Hz, 2H), 7.85-7.73 (m, 2H), 7.65-7.55 (m, 3H), 7.47-7.36 (m, 2H).

2-Phenylbenzothiazole: <sup>1</sup>H NMR (400 MHz, Chloroform-*d*) δ 8.11-8.09 (m, 3H), 7.88 (d, *J* = 8.0 Hz, 1H), 7.52-7.49 (m, 4H), 7.38 (t, *J* = 8.0 Hz, 1H); <sup>13</sup>C NMR (101 MHz, Chloroform-*d*) δ 168.1, 154.2, 135.2, 133.7, 131.1, 129.1, 127.6, 126.4, 125.3, 123.3, 121.7. <sup>1</sup>H NMR (400 MHz, DMSO-*d*<sub>6</sub>) δ H 8.28–8.24 (m, 2H), 7.89–7.86 (m, 2H), 7.69–7.65 (m, 3H), 7.48–7.44 (m, 2H).

*N*-Benzyl-2-aminobenzo[*d*]thiazole: <sup>1</sup>H NMR (400 MHz, Chloroform-*d*) δ H 7.60 (dd, *J* = 7.9, 1.2 Hz, 1H), 7.52 (d, *J* = 8.0 Hz, 1H), 7.45-7.26 (m, 6H), 7.11 (t, *J* = 7.2 Hz, 1H), 6.13 (br s, 1H), 4.66 (s, 2H); <sup>13</sup>C NMR (101 MHz, Chloroform-*d*) δ 167.9, 152.3, 137.6, 129.0, 128.0, 127.8, 126.2, 127.0, 121.8, 121.0, 119.0, 49.6; <sup>1</sup>H NMR (400 MHz, DMSO-*d*<sub>6</sub>): δ 8.52 (br s, 1H), 7.68 – 7.00 (m, 9H), 4.60 (s, 2H).

## 1.7 Synthesis of Mesitylcopper(I)

Compounds were prepared according to previous publication.<sup>4</sup> Magnesium turnings (2.48g, 100 mmol) were dried using a heat gun under vacuum in a Schlenk round bottom flask for at least 20 minutes with stirring. The flask was then filled with N<sub>2</sub> and cooled down to room temperature, followed by the addition of 100 mL of pre-dried and degassed THF. 2-Bromomesitylene (15.30 mL, 100 mmol) was added slowly into the magnesium suspension solution at room temperature. Afterward, the mixture was stirring at 0 °C for 2 h to give a grey solution of MgMesBr. Another Schlenk round bottom flask, charged with CuCl (10.90 g, 100 mmol) under N<sub>2</sub> atmosphere, was used to dissolve it in 50 mL of THF. The CuCl solution was cooled down to –78 °C while

being stirred, and the MgMesBr solution was subsequently transferred into it using a PTFE cannula. The obtained green mixture was kept stirring overnight under N<sub>2</sub> atmosphere. Afterward, 60 mL anhydrous dioxane was added to the suspension and allowed to stir for another 30 minutes. A Schlenk tube equipped with a filter stick and a 3 cm layer of pre-dried Celite was flushed with N<sub>2</sub>. The suspension was transferred into the filter stick by PTFE cannula (the end on reaction mixture side was equipped with filter paper to avoid the solid blocking the filter stick). The bright yellow filtrate was collected into the Schlenk tube at the end of the filtration. The solvent was evaporated under vacuum to obtain yellow solid which was then redissolved in 50 mL anhydrous toluene. The insoluble impurities were filtered by cannula to obtain bright yellow clear solution which was further concentrated and then placed in the freezer overnight. The pale yellow crystal was collected by removing the solvent using a PTFE cannula and then dried under vacuum to give the pure product. The filtrate was concentrated again and placed in the freezer again overnight to give the product. Pale yellow solid (8.79 g, 48%), <sup>1</sup>H NMR (400 MHz, benzene-*d*<sub>6</sub>) δ 6.67 (2 H, s), 6.59 (2 H, s), 2.92 (6 H, s), 2.93 (6 H, s) 2.02 (3 H, s), 1.90 (3 H, s). <sup>13</sup>C NMR (101 MHz, benzene-*d*<sub>6</sub>) δ 154.31, 152.50, 141.19, 140.52, 128.96, 126.65, 29.01, 28.77, 20.96, 20.81.

### 1.8 General Copper(I) Complexes Synthesis Procedure

All copper(I) complexes were prepared and handled under an inert atmosphere of dry N<sub>2</sub> to prevent decomposition. A 4 mL vial was charged with mesitylcopper(I) (18 mg, 0.1 mmol) and aryl halides (0.1 mmol) fully dissolved in dry toluene (1.0 mL). The vial was placed inside a larger vial (20 mL) containing dry hexane (500 μL) and left at room temperature. Colourless crystals started to form in the inner vial after 24 h, and were isolated after 72 h.

Cu<sub>4</sub>**1a'**<sub>4</sub>: <sup>1</sup>H NMR (400 MHz, DMSO-*d*<sub>6</sub>) δ 7.73 (s, 2H), 7.31 (dd, *J* = 7.9, 1.5 Hz, 1H), 7.26 (t, *J* = 7.3 Hz, 1H), 7.12 (t, *J* = 7.5 Hz, 3H), 7.02 (s, 1H), 6.96 (td, *J* = 7.6, 1.7 Hz, 1H). Elemental analysis: Found 53.18; H 3.16; N 4.71. C<sub>52</sub>H<sub>36</sub>Cl<sub>4</sub>Cu<sub>4</sub>N<sub>4</sub>O<sub>4</sub> requires 53.07 H 3.08; N 4.76%.

**Cu<sub>4</sub>2a'**<sub>4</sub>: <sup>1</sup>H NMR (400 MHz, DMSO-*d*<sub>6</sub>) δ 7.40 (d, *J* = 8.0 Hz, 1H), 7.30 – 7.16 (m, 6H), 7.13 – 7.05 (m, 1H), 6.93 (d, *J* = 7.9 Hz, 1H); Elemental analysis: Found C 53.86; H 3.41; N 4.23. C<sub>52</sub>H<sub>36</sub>Cl<sub>4</sub>Cu<sub>4</sub>N<sub>4</sub>S<sub>4</sub> requires 50.32; H 2.92; N 4.51%. Contains solvent residues in crystal.

**Cu<sub>4</sub>2b'**<sub>4</sub>: <sup>1</sup>H NMR (400 MHz, DMSO-*d*<sub>6</sub>) δ 8.21 – 8.04 (m, 3H), 7.66 – 7.42 (m, 4H), 7.33 – 7.09 (m, 2H); Elemental analysis: Found C 44.02; H 2.56; N 3.95. C<sub>52</sub>H<sub>36</sub>Br<sub>4</sub>Cu<sub>4</sub>N<sub>4</sub>S<sub>4</sub> requires C 44.02; H 2.72; N 3.80%.

**Cu<sub>4</sub>3a'**<sub>4</sub>: <sup>1</sup>H NMR (400 MHz, DMSO-*d*<sub>6</sub>) δ 7.51 – 6.82 (m, 9H), 4.57 (s, 2H); Elemental analysis: Found C 49.56; H 3.56; N 8.26. C<sub>56</sub>H<sub>48</sub>Cl<sub>4</sub>N<sub>8</sub>S<sub>4</sub> requires C 49.70; H 3.28; N 8.28%.

**Cu<sub>4</sub>3b'**<sub>4</sub>: <sup>1</sup>H NMR (400 MHz, DMSO-*d*<sub>6</sub>) δ 8.64 (s, 1H), 7.70 (dd, *J* = 7.9, 1.3 Hz, 1H), 7.47 – 7.12 (m, 6H), 7.04 (td, *J* = 7.6, 1.2 Hz, 1H), 4.60 (d, *J* = 5.8 Hz, 2H); Elemental analysis: Found C 43.91; H 3.13; N 7.30. C<sub>56</sub>H<sub>48</sub>Br<sub>4</sub>N<sub>8</sub>S<sub>4</sub> requires C 43.82; H 3.15; N 7.30%.



## 1.9 $\text{Cu}_4\text{N}_4\text{O}_4\text{C}_4$ and $\text{Cu}_4\text{N}_4\text{S}_4\text{C}_4$ clusters

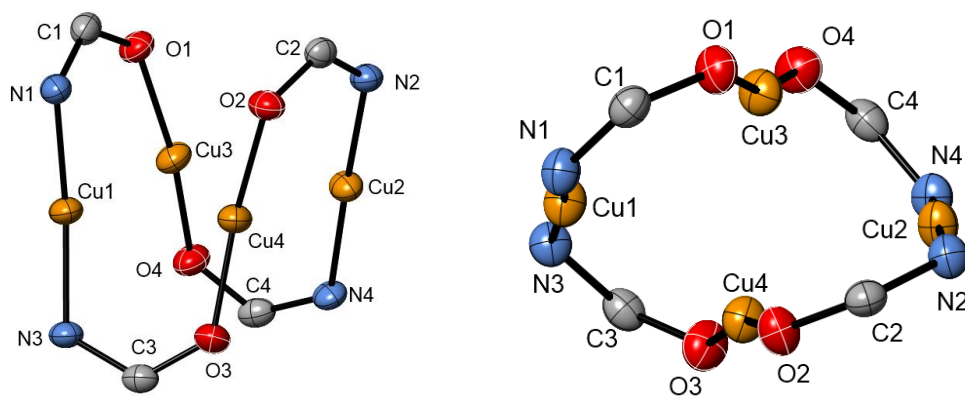

**Figure S1.1**  $\text{Cu}_41\mathbf{a}'_4$ :  $\text{Cu}_4\text{N}_4\text{O}_4\text{C}_4$  16-membered ring.

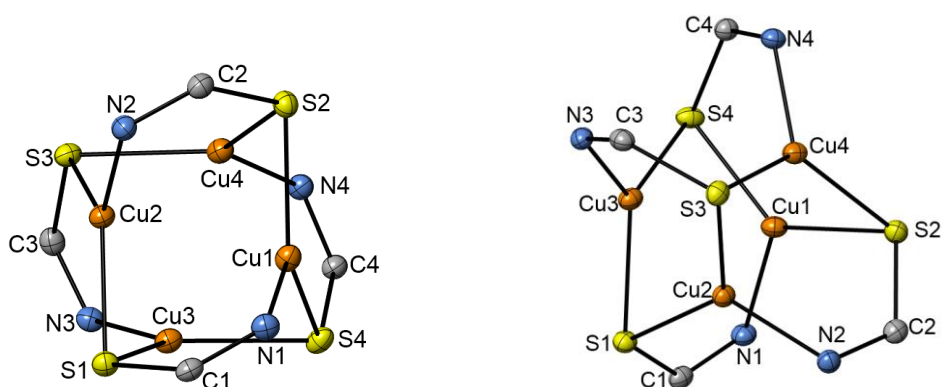

**Figure S1.2**  $\text{Cu}_42\mathbf{a}'_4$ :  $\text{Cu}_4\text{N}_4\text{S}_4\text{C}_4$  16-membered ring.

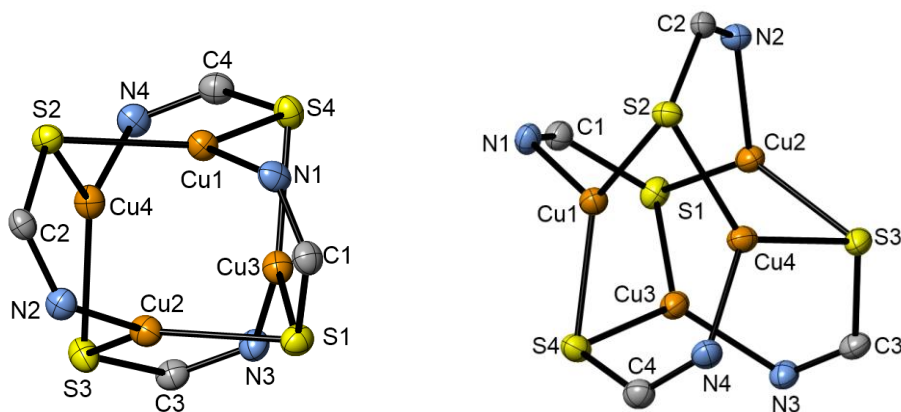

**Figure S1.3**  $\text{Cu}_42\mathbf{b}'_4$ :  $\text{Cu}_4\text{N}_4\text{S}_4\text{C}_4$  16-membered ring.

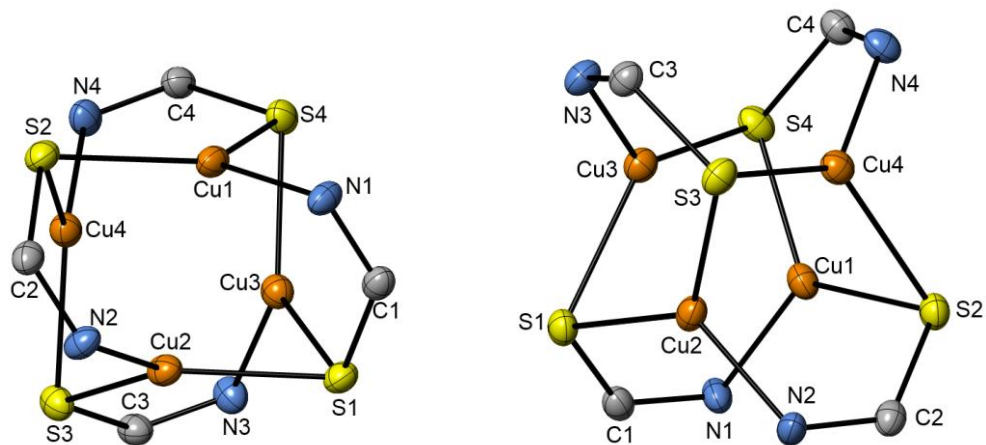

**Figure S1.4**  $\text{Cu}_4\mathbf{3a}'_4$ :  $\text{Cu}_4\text{N}_4\text{S}_4\text{C}_4$  16-membered ring.

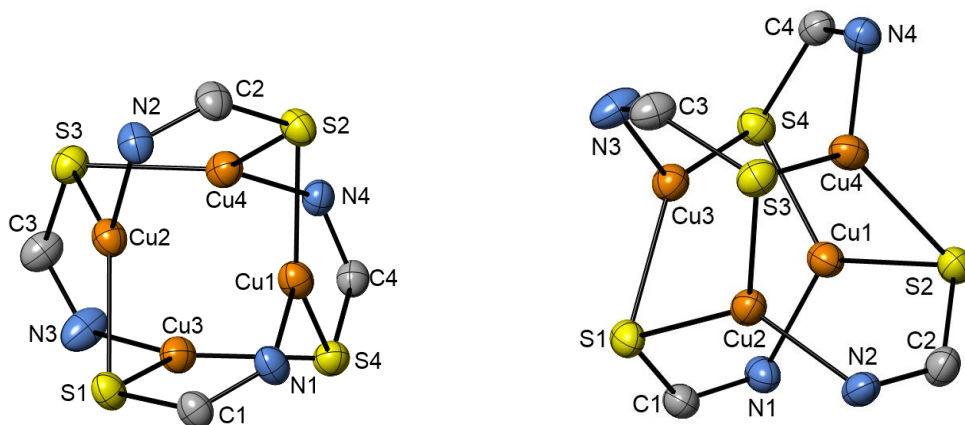

**Figure S1.5**  $\text{Cu}_4\mathbf{3b}'_4$ :  $\text{Cu}_4\text{N}_4\text{S}_4\text{C}_4$  16-membered ring.

## 2 X-ray Crystallographic Data

**Table S2.1.** Crystal Data, Data Collection and Refinement Parameters for the structures of Cu<sub>4</sub>1a'<sub>4</sub>, Cu<sub>4</sub>2a'<sub>4</sub>, Cu<sub>4</sub>2b'<sub>4</sub>, Cu<sub>4</sub>3a'<sub>4</sub>, Cu<sub>4</sub>3b'<sub>4</sub>, and 3a.

| data                                                               | Cu <sub>4</sub> 1a' <sub>4</sub>                                                              | Cu <sub>4</sub> 2a' <sub>4</sub>                                                              | Cu <sub>4</sub> 2b' <sub>4</sub>                                                              | Cu <sub>4</sub> 3a' <sub>4</sub>                                                              |
|--------------------------------------------------------------------|-----------------------------------------------------------------------------------------------|-----------------------------------------------------------------------------------------------|-----------------------------------------------------------------------------------------------|-----------------------------------------------------------------------------------------------|
| <b>formula</b>                                                     | C <sub>52</sub> H <sub>36</sub> Cl <sub>4</sub> Cu <sub>4</sub> N <sub>4</sub> O <sub>4</sub> | C <sub>52</sub> H <sub>36</sub> Cl <sub>4</sub> Cu <sub>4</sub> N <sub>4</sub> S <sub>4</sub> | C <sub>52</sub> H <sub>36</sub> Br <sub>4</sub> Cu <sub>4</sub> N <sub>4</sub> S <sub>4</sub> | C <sub>56</sub> H <sub>48</sub> Cl <sub>4</sub> Cu <sub>4</sub> N <sub>8</sub> S <sub>4</sub> |
| <b>solvent</b>                                                     | —                                                                                             | C <sub>7</sub> H <sub>8</sub> ·0.5(C <sub>6</sub> H <sub>6</sub> )                            | 1.5(C <sub>7</sub> H <sub>8</sub> )                                                           | 0.5(C <sub>7</sub> H <sub>8</sub> )                                                           |
| <b>formula weight</b>                                              | 1176.81                                                                                       | 1376.27                                                                                       | 1557.09                                                                                       | 1403.29                                                                                       |
| <b>colour, habit</b>                                               | pale yellow                                                                                   | yellow blocks                                                                                 | yellow blocks                                                                                 | colourless thin                                                                               |
| <b>temperature / K</b>                                             | 173                                                                                           | 173                                                                                           | 173                                                                                           | 173                                                                                           |
| <b>crystal system</b>                                              | monoclinic                                                                                    | triclinic                                                                                     | triclinic                                                                                     | triclinic                                                                                     |
| <b>space group</b>                                                 | <i>P</i> 2 <sub>1</sub> / <i>c</i> (no. 14)                                                   | <i>P</i> -1 (no. 2)                                                                           | <i>P</i> -1 (no. 2)                                                                           | <i>P</i> -1 (no. 2)                                                                           |
| <b><i>a</i> / Å</b>                                                | 9.3512(2)                                                                                     | 12.5083(3)                                                                                    | 12.7540(6)                                                                                    | 10.2309(3)                                                                                    |
| <b><i>b</i> / Å</b>                                                | 30.6297(7)                                                                                    | 14.5425(4)                                                                                    | 14.5329(6)                                                                                    | 13.7555(5)                                                                                    |
| <b><i>c</i> / Å</b>                                                | 16.8167(5)                                                                                    | 18.2347(4)                                                                                    | 18.2953(6)                                                                                    | 21.4692(10)                                                                                   |
| <b><i>α</i> / deg</b>                                              | 90                                                                                            | 88.840(2)                                                                                     | 88.595(3)                                                                                     | 76.317(4)                                                                                     |
| <b><i>β</i> / deg</b>                                              | 94.298(2)                                                                                     | 80.557(2)                                                                                     | 80.345(3)                                                                                     | 81.511(3)                                                                                     |
| <b><i>γ</i> / deg</b>                                              | 90                                                                                            | 66.647(2)                                                                                     | 64.848(4)                                                                                     | 80.941(3)                                                                                     |
| <b><i>V</i> / Å<sup>3</sup></b>                                    | 4803.1(2)                                                                                     | 3000.27(14)                                                                                   | 3021.9(2)                                                                                     | 2879.8(2)                                                                                     |
| <b><i>Z</i></b>                                                    | 4                                                                                             | 2                                                                                             | 2                                                                                             | 2                                                                                             |
| <b><i>D<sub>c</sub></i> / g cm<sup>-3</sup></b>                    | 1.627                                                                                         | 1.523                                                                                         | 1.711                                                                                         | 1.618                                                                                         |
| <b>radiation used</b>                                              | Mo-Kα                                                                                         | Mo-Kα                                                                                         | Mo-Kα                                                                                         | Cu-Kα                                                                                         |
| <b><i>μ</i> / mm<sup>-1</sup></b>                                  | 2.020                                                                                         | 1.759                                                                                         | 4.214                                                                                         | 5.104                                                                                         |
| <b>no. of unique reflns</b>                                        |                                                                                               |                                                                                               |                                                                                               |                                                                                               |
| <b>measured (<i>R</i><sub>int</sub>)</b>                           | 9598 (0.0224)                                                                                 | 11832 (0.0170)                                                                                | 11868 (0.0188)                                                                                | 10969 (0.0550)                                                                                |
| <b>obs,  <i>F</i><sub>o</sub>  &gt; 4σ( <i>F</i><sub>o</sub> )</b> | 7569                                                                                          | 9293                                                                                          | 9167                                                                                          | 8288                                                                                          |
| <b>completeness (%) [a]</b>                                        | 99.0                                                                                          | 98.7                                                                                          | 98.3                                                                                          | 98.1                                                                                          |
| <b>no. of variables</b>                                            | 618                                                                                           | 710                                                                                           | 718                                                                                           | 753                                                                                           |
| <b><i>R</i><sub>1</sub>(obs), <i>wR</i><sub>2</sub>(all) [b]</b>   | 0.0392, 0.0836                                                                                | 0.0377, 0.0884                                                                                | 0.0410, 0.0918                                                                                | 0.0444, 0.1137                                                                                |
| <b>CCDC code</b>                                                   | 2349373                                                                                       | 2349374                                                                                       | 2349375                                                                                       | 2349376                                                                                       |

[a] Completeness to 0.84 Å resolution. [b]  $R_1 = \sum ||F_o| - |F_c|| / \sum |F_o|$ ;  $wR_2 = \{\sum [w(F_o^2 - F_c^2)^2] / \sum [w(F_o^2)^2]\}^{1/2}$ ;  $w^{-1} = \sigma^2(F_o^2) + (aP)^2 + bP$ .

Table S2.1. ...continued

| data                                                          | Cu <sub>4</sub> <b>3b'</b> <sub>4</sub>                                                       | <b>3a</b>                                          |
|---------------------------------------------------------------|-----------------------------------------------------------------------------------------------|----------------------------------------------------|
| formula                                                       | C <sub>56</sub> H <sub>48</sub> Br <sub>4</sub> Cu <sub>4</sub> N <sub>8</sub> S <sub>4</sub> | C <sub>14</sub> H <sub>13</sub> ClN <sub>2</sub> S |
| solvent                                                       | 0.5(C <sub>7</sub> H <sub>8</sub> )                                                           | —                                                  |
| formula weight                                                | 1581.13                                                                                       | 276.77                                             |
| colour, habit                                                 | colourless                                                                                    | colourless                                         |
| temperature / K                                               | 173                                                                                           | 173                                                |
| crystal system                                                | triclinic                                                                                     | monoclinic                                         |
| space group                                                   | <i>P</i> -1 (no. 2)                                                                           | <i>P</i> 2 <sub>1</sub> / <i>c</i> (no. 14)        |
| <i>a</i> / Å                                                  | 10.3465(5)                                                                                    | 23.3769(16)                                        |
| <i>b</i> / Å                                                  | 13.9442(4)                                                                                    | 7.4920(4)                                          |
| <i>c</i> / Å                                                  | 21.4846(10)                                                                                   | 7.6506(5)                                          |
| $\alpha$ / deg                                                | 75.376(4)                                                                                     | 90                                                 |
| $\beta$ / deg                                                 | 81.788(4)                                                                                     | 91.574(6)                                          |
| $\gamma$ / deg                                                | 81.693(3)                                                                                     | 90                                                 |
| <i>V</i> / Å <sup>3</sup>                                     | 2949.4(2)                                                                                     | 1339.43(14)                                        |
| <i>Z</i>                                                      | 2                                                                                             | 4                                                  |
| <i>D</i> <sub>c</sub> / g cm <sup>-3</sup>                    | 1.780                                                                                         | 1.372                                              |
| radiation used                                                | Cu-K $\alpha$                                                                                 | Mo-K $\alpha$                                      |
| $\mu$ / mm <sup>-1</sup>                                      | 6.491                                                                                         | 0.424                                              |
| no. of unique reflns                                          |                                                                                               |                                                    |
| measured ( <i>R</i> <sub>int</sub> )                          | 11244 (0.0419)                                                                                | 2676 (0.0260)                                      |
| obs, $ F_o  > 4\sigma( F_o )$                                 | 8496                                                                                          | 2110                                               |
| completeness (%) [a]                                          | 98.2                                                                                          | 98.8                                               |
| no. of variables                                              | 773                                                                                           | 171                                                |
| <i>R</i> <sub>1</sub> (obs), <i>wR</i> <sub>2</sub> (all) [b] | 0.0465, 0.1169                                                                                | 0.0572, 0.1347                                     |
| CCDC code                                                     | 2349377                                                                                       | 2349378                                            |

Table S2.1 provides a summary of the crystallographic data for the structures of Cu<sub>4</sub>**1a'**<sub>4</sub>, Cu<sub>4</sub>**2a'**<sub>4</sub>, Cu<sub>4</sub>**2b'**<sub>4</sub>, Cu<sub>4</sub>**3a'**<sub>4</sub>, Cu<sub>4</sub>**3b'**<sub>4</sub>, and **3a**. Data were collected using Agilent Xcalibur 3 E (Cu<sub>4</sub>**1a'**<sub>4</sub>, Cu<sub>4</sub>**2a'**<sub>4</sub>, Cu<sub>4</sub>**2b'**<sub>4</sub> and **3a**) and Xcalibur PX Ultra A (Cu<sub>4</sub>**3a'**<sub>4</sub> and Cu<sub>4</sub>**3b'**<sub>4</sub>) diffractometers with Mo-K $\alpha$  and Cu-K $\alpha$  radiation respectively, and the structures were solved and refined using the OLEX2,<sup>5</sup> SHELXTL<sup>6</sup> and SHELX-2013<sup>7</sup> program systems. CCDC 2349373 to 2349378.

#### The X-ray crystal structure of Cu<sub>4</sub>**1a'**<sub>4</sub>

The N42-bound chlorophenyl ring in the structure of Cu<sub>4</sub>**1a'**<sub>4</sub> was found to be disordered. Two orientations were identified of ca. 87 and 13% occupancy, their geometries were optimised, the thermal parameters of adjacent atoms were restrained to be similar, and only the non-hydrogen atoms of the major occupancy orientation were refined anisotropically (those of the minor occupancy orientation were refined isotropically).

### **The X-ray crystal structure of Cu<sub>4</sub>2a'<sub>4</sub>**

The C80-based included toluene solvent molecule in the structure of Cu<sub>4</sub>2a'<sub>4</sub> was found to be disordered. Two orientations were identified of ca. 56 and 44% occupancy, their geometries were optimised, the thermal parameters of adjacent atoms were restrained to be similar, and only the non-hydrogen atoms of the major occupancy orientation were refined anisotropically (those of the minor occupancy orientation were refined isotropically).

### **The X-ray crystal structure of Cu<sub>4</sub>2b'<sub>4</sub>**

The C80-based included toluene solvent molecule in the structure of Cu<sub>4</sub>2b'<sub>4</sub> was found to be disordered. Two orientations were identified of ca. 57 and 43% occupancy, their geometries were optimised, the thermal parameters of adjacent atoms were restrained to be similar, and only the non-hydrogen atoms of the major occupancy orientation were refined anisotropically (those of the minor occupancy orientation were refined isotropically). The C90-based included toluene solvent molecule was found to be disordered across a centre of symmetry, and two unique orientations were identified of ca. 25 and 25% occupancy (with two further orientations of the same occupancies being generated by operation of the inversion centre). The geometries of the two unique orientations were optimised, the thermal parameters of adjacent atoms were restrained to be similar, and all of the atoms were refined isotropically.

### **The X-ray crystal structure of Cu<sub>4</sub>3a'<sub>4</sub>**

The C80-based included toluene solvent molecule in the structure of Cu<sub>4</sub>3a'<sub>4</sub> was found to be disordered across a centre of symmetry. This was modelled using one complete, 50% occupancy, orientation (with a second 50% occupancy orientation being generated by operation of the inversion centre). The geometry of the unique orientation was optimised and all of the non-hydrogen atoms were refined anisotropically. The N9–, N29–, N49– and N69–H hydrogen atoms were all located from  $\Delta F$  maps and refined freely subject to an N–H distance constraint of 0.90 Å.

### **The X-ray crystal structure of Cu<sub>4</sub>3b'<sub>4</sub>**

The N42- and N62-bound bromophenyl rings in the structure of Cu<sub>4</sub>3b'<sub>4</sub> were found to be disordered and two orientations were identified of ca. 75 and 25% occupancy in each case. The geometries of each pair of orientations were optimised, the thermal parameters of adjacent atoms were restrained to be similar, and only the non-hydrogen atoms of the major occupancy orientations, and the bromine atoms of the minor occupancy orientations, were refined anisotropically (the remainder were refined isotropically). The C80-based included toluene solvent molecule was found to be disordered across a centre of symmetry. This was modelled using one complete, 50% occupancy, orientation (with a second 50% occupancy orientation being generated by operation of the inversion centre). The geometry of the unique orientation was optimised and all of the non-hydrogen atoms were refined anisotropically. The N9–, N29–, N49– and N69–H hydrogen atoms were all located from  $\Delta F$  maps and refined freely subject to an N–H distance constraint of 0.90 Å.

### The X-ray crystal structure of 3a

The N2– and N9–H hydrogen atoms in the structure of 3a were located from  $\Delta F$  maps and refined freely subject to an N–H distance constraint of 0.90 Å.

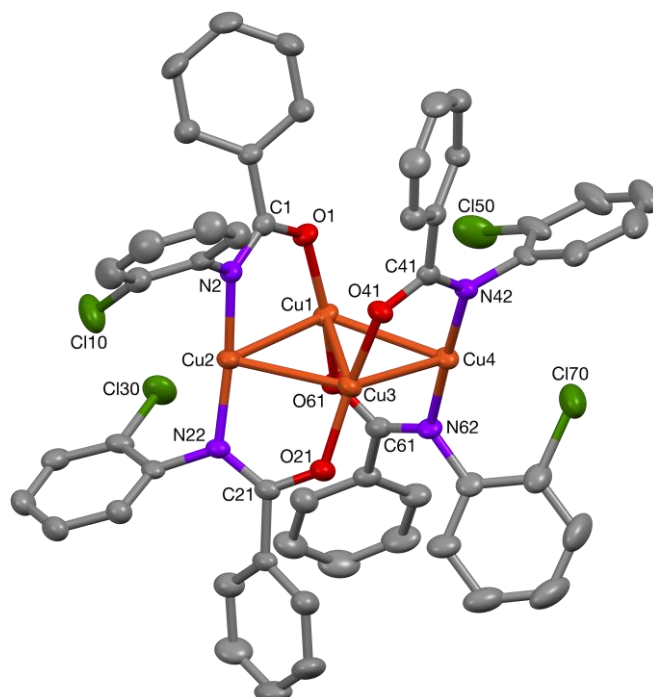

**Figure S2.1** The crystal structure of  $\text{Cu}_4\mathbf{1a}'_4$  (50% probability ellipsoids).

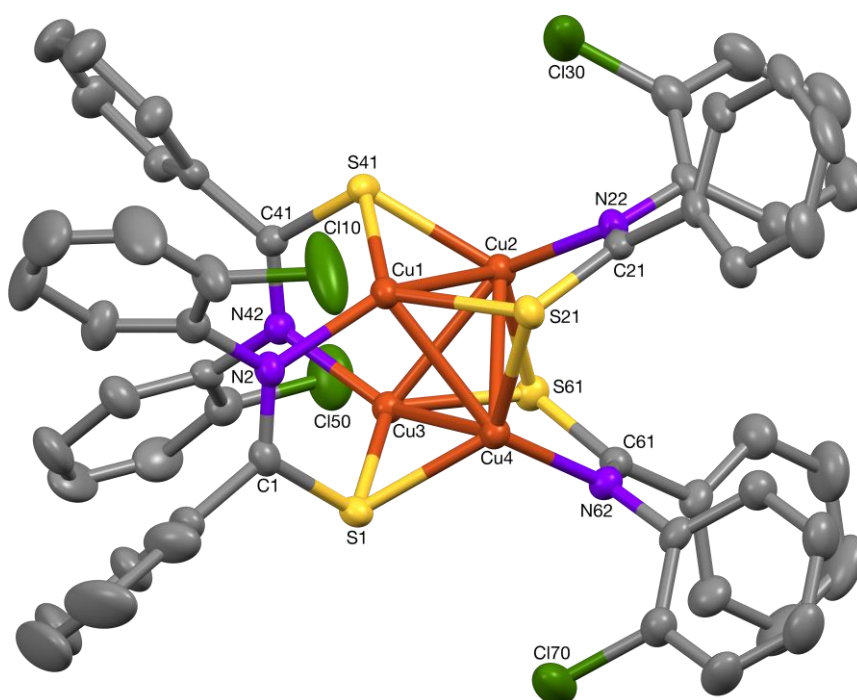

**Figure S2.2** The crystal structure of  $\text{Cu}_4\mathbf{2a}'_4$  (50% probability ellipsoids).

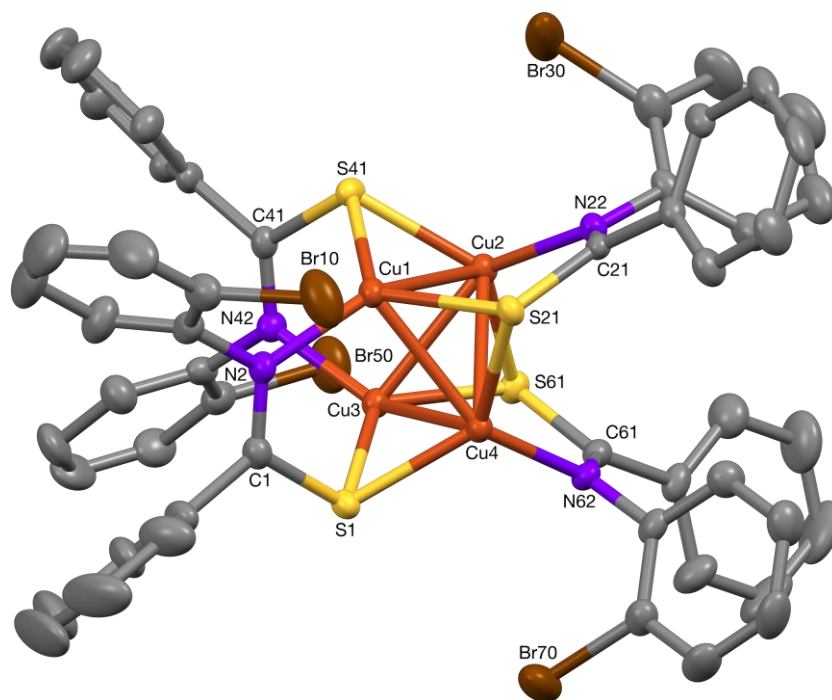

**Figure S2.3** The crystal structure of  $\text{Cu}_4\mathbf{2b}'_4$  (50% probability ellipsoids).

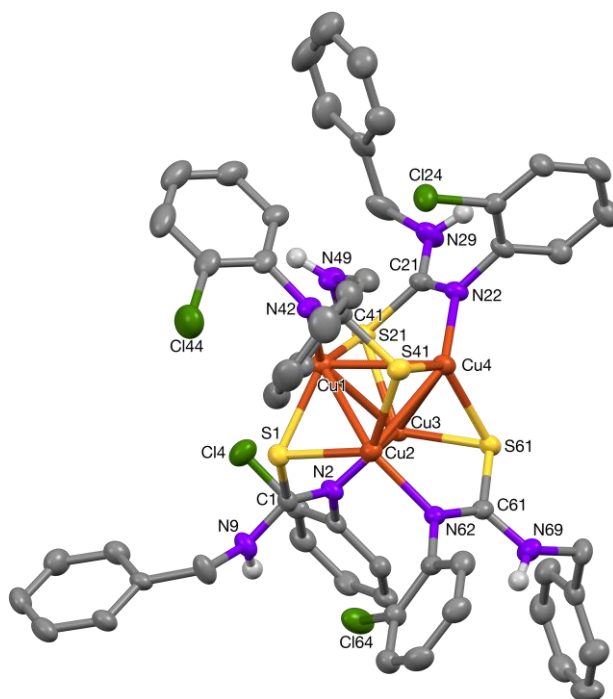

**Figure S2.4** The crystal structure of  $\text{Cu}_4\mathbf{3a}'_4$  (50% probability ellipsoids).

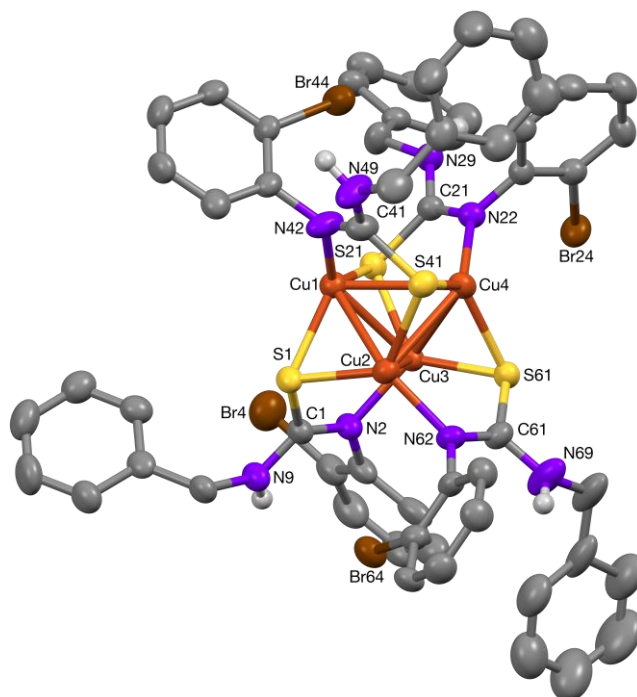

**Figure S2.5** The crystal structure of  $\text{Cu}_4\mathbf{3b}'_4$  (50% probability ellipsoids).

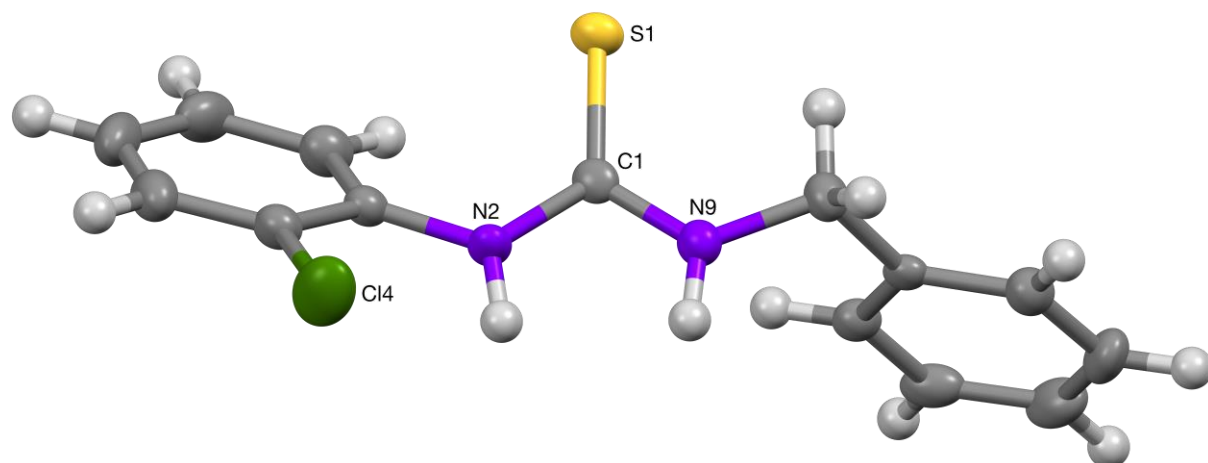

**Figure S2.6** The crystal structure of  $\mathbf{3a}$  (50% probability ellipsoids).



### 3 NMR spectra

Note that the spectra of  $\text{Cu}_4\mathbf{3a}'_4$  and  $\text{Cu}_4\mathbf{3b}'_4$  contain residual toluene (see SCXRD data Table S2.1)

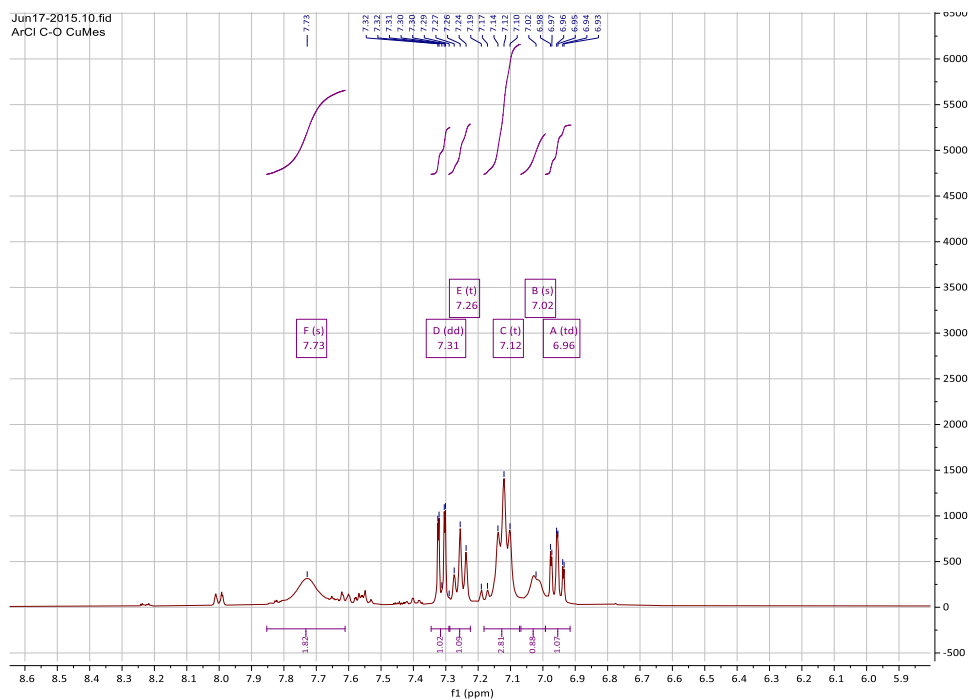

Figure S3.1  $^1\text{H}$  NMR of  $\text{Cu}_4\mathbf{1a}'_4$

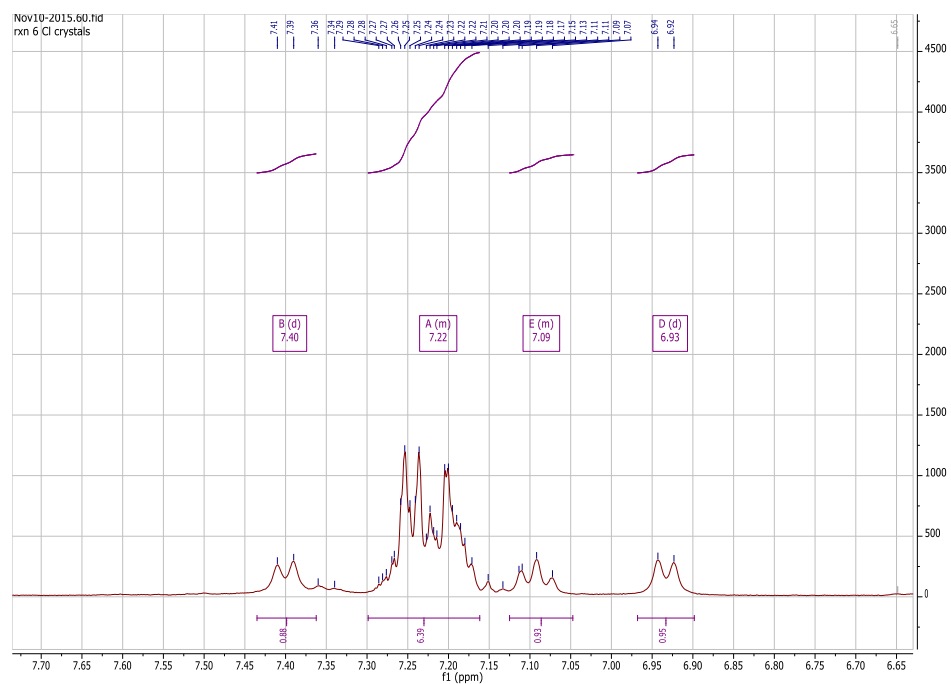

Figure S3.2  $^1\text{H}$  NMR of  $\text{Cu}_4\mathbf{2a}'_4$

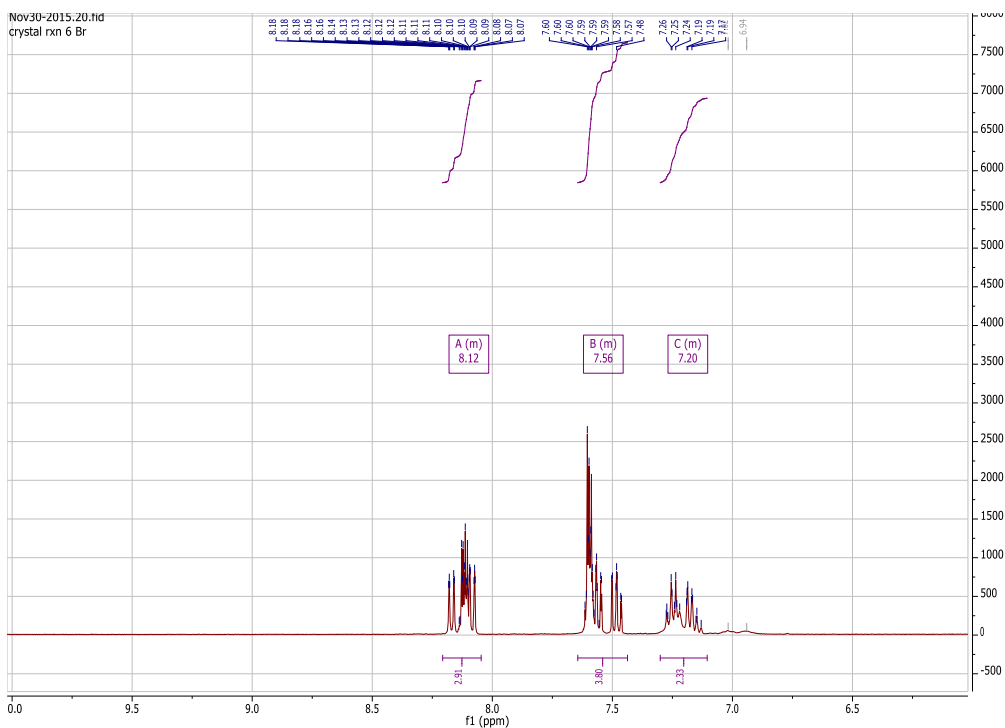

Figure S3.3  $^1\text{H}$  NMR of  $\text{Cu}_4\mathbf{2b}'_4$

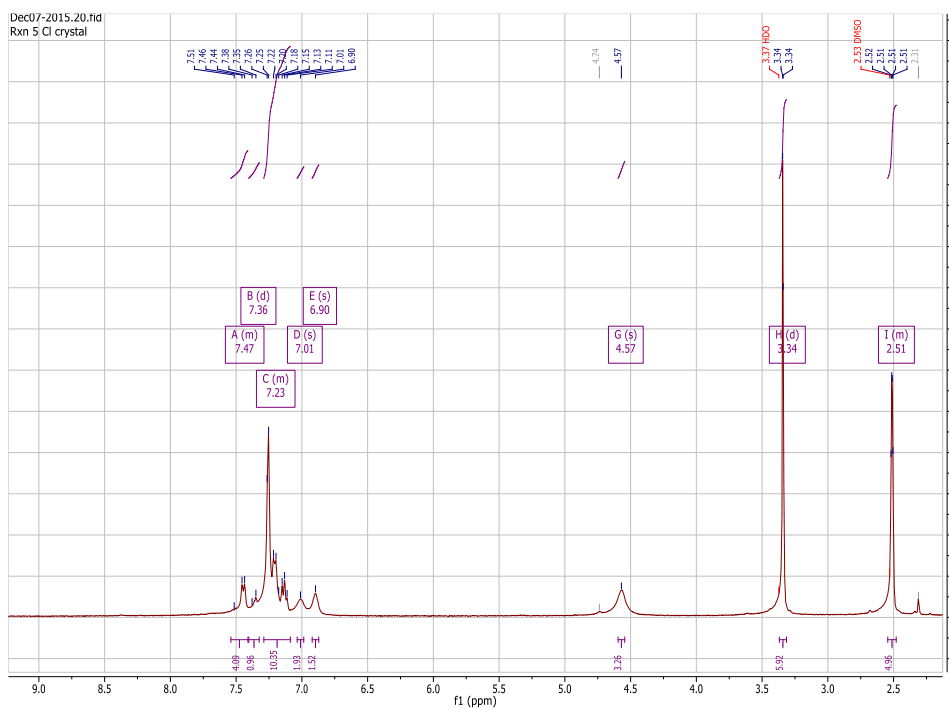

Figure S3.4  $^1\text{H}$  NMR of  $\text{Cu}_4\mathbf{3a}'_4$

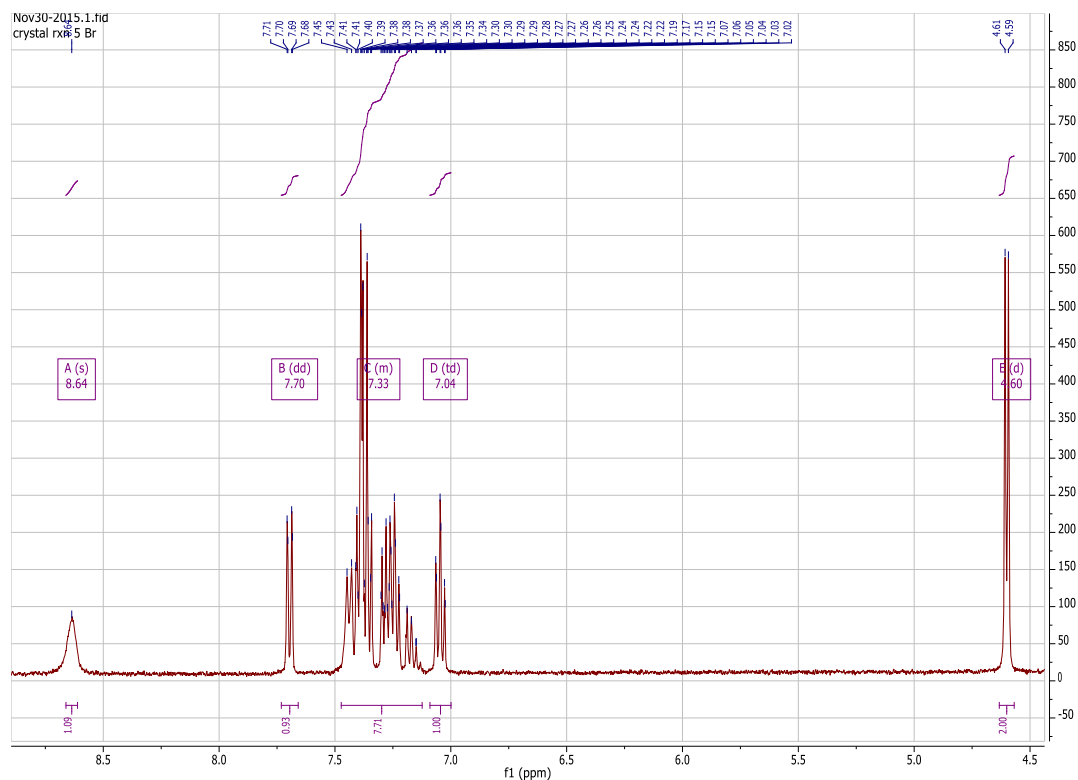

**Figure S3.5**  $^1\text{H}$  NMR of  $\text{Cu}_4\mathbf{3b}'_4$

#### 4 References

- 1 E. Feng, H. Huang, Y. Zhou, D. Ye, H. Jiang and H. Liu, *J. Comb. Chem.*, 2010, **12**, 422–429.
- 2 D. Bernardi, L. Ba and G. Kirsch, *Synlett.*, 2007, **13**, 2121–2123.
- 3 S. Sharma, K. C. Basavaraju, A. K. Singh and D. P. Kim, *Org. Lett.*, 2014, **16**, 3974–3977.
- 4 T. Tsuda, T. Yazawa, K. Watanabe, T. Fujii and T. Saegusa, *J. Org. Chem.*, 1981, **46**, 192–194.
- 5 O.V. Dolomanov, L.J. Bourhis, R.J. Gildea, J.A.K. Howard, H. Puschmann, *J. Appl. Cryst.*, 2009, **42**, 339-341.
- 6 SHELXTL v5.1, Bruker AXS, Madison, WI, 1998.
- 7 SHELX-2013, G.M. Sheldrick, *Acta Cryst.*, 2015, **C71**, 3-8.
